# Supplementary material for: Hypoxia promotes acquisition of aggressive phenotypes in human malignant mesothelioma
Source: BMC Cancer. 2018 Aug 15;18:819. doi: 10.1186/s12885-018-4720-z (PMC6094475; doi:10.1186/s12885-018-4720-z)
Supplement: Supplementary file 1 — Table S1. The list of primers used in this study. (XLSX 10 kb) [file 12885_2018_4720_MOESM1_ESM.xlsx]

## Sheet: Sheet1
Table S1. Primers used
Target genes	Direction	Primer sequences (5'->3')
Oct4	Forward	GGAGATATGCAAAGCAGAAAC
	Reverse	GAACAAATTCTCCAGGTTGCC
Sox2	Forward	CGATGCCGACAAGAAAACTT
	Reverse	CAAACTTCCTGCAAAGCTCC
Nanog	Forward	TTCAGTCTGGACACTGGCTG
	Reverse	CTCGCTGATTAGGCTCCAAC
Smo	Forward	GAATGAGGTGCAGAACATCAAG
	Reverse	GTCCTCGTACCAGCTCTTG
Gli1	Forward	GAGCCCATCTCTGGGATTC
	Reverse	GTCCAGCTCAGACTTCAGC
Shh	Forward	CAGAGGTGTAAGGACAAGTTG
	Reverse	CGTAGTGCAGAGACTCCTC
β catenin	Forward	GCCGGCTATTGTAGAAGCTG
	Reverse	GAGTCCCAAGGAGACCTTCC
Notch1	Forward	GCAGTTGTGCTCCTGAAGAA
	Reverse	CGGGCGGCCAGAAAC
Bmi1	Forward	CCGGGATTTTTTATCAAGCAG
	Reverse	GTTGTGGCATCAATGAAGTACC
GAPDH	Forward	CTGCACCACCAACTGCTTAG
	Reverse	AGGTCCACCACTGACACGTT
